1 **Fresh insights into Mediterranean biodiversity: Environmental DNA**  
2 **reveals spatio-temporal patterns of stream invertebrate communities**  
3 **on Sicily**

4 Kamil Hupalo<sup>1,\*</sup>, Saskia Schmidt<sup>1,2</sup>, Till-Hendrik Macher<sup>1</sup>, Martina Weiss<sup>1,3</sup>, Florian Leese<sup>1,3</sup>

5 <sup>1</sup>Aquatic Ecosystem Research, Faculty of Biology, University of Duisburg-Essen, Essen, Germany

6 <sup>2</sup>Department of Animal Ecology, U4, German Federal Institute of Hydrology, Koblenz, Germany

7 <sup>3</sup>Centre for Water and Environmental Research (ZWU), University of Duisburg-Essen 45141 Essen,  
8 Germany

9 \*Corresponding author: [kamilhupalo@gmail.com](mailto:kamilhupalo@gmail.com)

10

11 **Abstract**

12 The Mediterranean region with its islands is among top biodiversity hotspots. It houses numerous  
13 freshwater taxa with a high rate of endemism, but is heavily impacted by anthropogenic pressures and  
14 global climate change. To conserve biodiversity, reliable data on species and genetic diversity are  
15 needed especially for the scarcely known insular freshwater ecosystems. Environmental DNA  
16 metabarcoding provide a straight-forward opportunity to assess aquatic biodiversity. Therefore, we  
17 conducted the first eDNA metabarcoding study in one stream catchment on Sicily. Specifically, we aimed  
18 to i) investigate spatial diversity patterns of macroinvertebrate communities, ii) assess seasonal changes,  
19 and iii) check if dispersal barriers can be identified. Water samples were taken at 27 different sites in two  
20 seasons and eDNA metabarcoding performed using the COI gene. In total, we detected 98  
21 macroinvertebrate species, including 28 taxa potentially new to Sicily. Exact sequence variant (ESV) and  
22 species composition data showed that diversity differed between seasons with less taxa detected in  
23 winter. We also detected a dispersal barrier, which had a stronger effect in autumn. Our findings show  
24 that eDNA metabarcoding provides valuable information on Sicilian freshwater biodiversity. We therefore  
25 encourage its application for understudied regions to better understand the state and dynamics of  
26 freshwater biodiversity.

27

28 **Keywords**

29 **eDNA, macroinvertebrates, freshwater, community, metabarcoding**

30

31 **Declarations**

32 **Funding:** This research was funded by German Research Foundation (DFG) (project LE 2323/9-1).

33 **Conflicts of interest:** None declared

34 **Availability of data and material:** Data is publicly available in the European Nucleotide Archive  
35 (PRJEB45583).

36 **Code availability:** MetaProcessor; available at <https://github.com/TillMacher/MetaProcessor>

37 **Ethics approval:** Not applicable

38 **Consent to participate and publication:** All authors agreed to participate in publication process.

39

#### 40 **Acknowledgements**

41 We would like to thank Marie-Thérèse Werner and Pedro M.G. Gomes for their valuable help during the  
42 sampling campaigns. We would also like to thank Fabio Stoch for providing in-depth information about the  
43 studied river system. We also thank Bernd Sures, Daniel Grabner, Diego Fontaneto for the logistic  
44 support and Florian Altermatt, Michał Grabowski, Alexander Weigand and Hanna Weigand for helpful  
45 discussions throughout the project.

46

47

48

49

50

51

52

53

54

55

56

57

58

59

60

61

62

## 63 **Introduction**

64 Freshwater ecosystems are hotspots of biodiversity (Strayer and Dudgeon 2010). Even though they only  
65 comprise roughly 1% of global land surface area (Dudgeon et al. 2006; Strayer and Dudgeon 2010),  
66 freshwater ecosystems host nearly 9.5% of Earth's described animal species (Balian et al. 2007).  
67 However, degradation of freshwater ecosystems is a global phenomenon, affecting in particular riverine  
68 habitats (Grill et al. 2019; Vörösmarty et al. 2010). Anthropogenic pressures are superimposed by the  
69 effects of global climate change, in particular heat waves, floods and droughts (Arnell 1999; Vörösmarty  
70 et al. 2010). As a consequence, freshwater faunal biodiversity is declining, making rivers and lakes the  
71 most endangered ecosystems in the world (Almond et al. 2020; Dudgeon et al. 2006; Reid et al. 2019).  
72 This holds true in particular for the Mediterranean region (De Figueroa et al. 2013), which is considered  
73 as one of the top biodiversity hotspots in the world (Médail and Quézel 1999; Myers et al. 2000). Here,  
74 diversity is especially high in freshwater ecosystems, housing more than 6% of the global freshwater  
75 biodiversity, with particularly high numbers of endemic and rare taxa found on Mediterranean islands (De  
76 Figueroa et al. 2013). Yet, islands are also among the most threatened ecosystems within the region, with  
77 a predominance of non-perennial rivers and streams particularly vulnerable to anthropogenic impacts  
78 (Hopkins 2002; Skoulikidis et al. 2017).

79 Freshwater invertebrates, and in particular aquatic macroinvertebrates, are biological key components  
80 known to shape local communities and prime indicators of water quality. This also seems to be true in the  
81 streams on Mediterranean islands, where local macroinvertebrates are recognized as bioindicators of  
82 ecological disturbance (Erba et al. 2015; Feio et al. 2014; García et al. 2014). However, evidence about  
83 drivers influencing the observed insular aquatic macroinvertebrate diversity over time is scarce and  
84 restricted to a limited area (Garcia et al. 2017; Lobera et al. 2019). Studying their local spatio-temporal  
85 patterns of distribution is crucial for understanding the state and dynamics of freshwater ecosystems  
86 (Skoulikidis et al. 2017). Given that species diversity is high but taxonomic expertise, in particular also  
87 determination keys, are often not available, biological surveys and bioindication often rely on data from  
88 higher taxonomic levels only, typically family level. While this level increases reliability of the data, it also  
89 misses out the true diversity. DNA metabarcoding provides new opportunities to study diversity of  
90 freshwater communities (Carew et al. 2013; Elbrecht et al. 2017). In particular, DNA metabarcoding of  
91 environmental DNA (eDNA) provides a great tool for studying aquatic biodiversity in a non-invasive and  
92 time-efficient way (Deiner et al. 2016; Goldberg et al. 2015; Rees et al. 2014). While most aquatic eDNA  
93 surveys have focused on vertebrate species (Closek et al. 2019; Hänfling et al. 2016; Harper et al. 2018),  
94 recent studies have shown that a lot of information can also be obtained for invertebrate species (Leese  
95 et al. 2021; Macher et al. 2018; Mächler et al. 2019), despite the problem that the template molecules  
96 from the target taxa could be 'watered down' (Hajibabaei et al. 2019). Getting a broad picture of local  
97 macroinvertebrate communities from multiple fine-scale localities and from different time points within a  
98 single river system without investing a large amount of time in taxonomic identification could be of  
99 paramount importance for a better understanding of the observed diversity patterns as well as for its  
100 management (Stubbington et al. 2018).

101 Knowledge about the diversity and distribution of freshwater macroinvertebrates in the Mediterranean  
102 region is constantly growing, both due to multinational (e.g. Fauna Europaea, GBIF) and local initiatives  
103 (Ruffo and Stoch 2006), but is still missing for many regions. While the accessibility of reference DNA  
104 barcodes for macroinvertebrates is growing, there is still a significant gap present (Curry et al. 2018;  
105 Weigand et al. 2019). This holds true in particular for Mediterranean countries for which operational  
106 routine monitoring taxa lists often use higher taxonomic levels than species. Thus, given the  
107 incompleteness of the reference databases, taxonomic assignment of obtained DNA information can be  
108 troublesome. In taxonomic groups with even scarcer reference DNA sequences available like diatoms  
109 and other unicellular eukaryotes or meiofauna, where the majority of obtained information cannot be  
110 assigned to species level, there is a notion of using molecular operational taxonomic units (OTUs) (Feio  
111 et al. 2020; Westcott and Schloss 2015) or exact sequence variants (ESVs) (Tapolczai et al. 2019;  
112 Tapolczai et al. 2021) for analyses of diversity patterns. By often providing more ecologically relevant  
113 information (Tapolczai et al. 2021; Zizka et al. 2020) and higher reusability compared to OTUs (Schmidt  
114 et al. 2015), ESV-based approaches could provide a promising solution for studying remote and  
115 understudied regions, where much of the observed molecular diversity cannot be assigned to species  
116 level, yet.

117 In this study, we conducted the first eDNA survey for a stream ecosystem on Sicily. Sicily is the largest  
118 Mediterranean island and is located in the central part of Mediterranean basin. The freshwater  
119 macroinvertebrate fauna is relatively well documented with approximately 1300 species being reported  
120 from the insular freshwater ecosystems (Ruffo and Stoch 2006). The freshwater ecosystems on the island  
121 exhibit a comparatively high level of local endemism (Stoch 2000), in some groups like Malacostraca  
122 even more than 50% of taxa are endemic (Hupało et al. 2021). However, still very little is known about  
123 Sicilian freshwater macroinvertebrate communities and their local spatio-temporal distribution and  
124 dynamics. By focussing in detail on a single river system in the central part of Sicily, we aimed to provide  
125 insights into i) the general biodiversity patterns of macroinvertebrate communities, ii) the turnover of local  
126 macroinvertebrate communities between autumn and winter, and iii) whether dispersal in those  
127 communities is hindered by a barrier in the riverscape. Additionally, our aim was to compare patterns  
128 inferred from a species-based approach to an ESV-based approach. With that, we aimed to evaluate if  
129 eDNA metabarcoding data can provide valuable information for assessment and monitoring of  
130 Mediterranean freshwater biodiversity, even when the DNA reference databases are incomplete.

131

## 132 **Materials & Methods**

### 133 *Field sampling*

134 Water samples were collected during two seasonal sampling campaigns conducted in September 2019  
135 (autumn) and January 2020 (winter) in the Fosso del Tempio river system on Sicily. The studied river  
136 system belongs to the basin of Fiume dei Monaci, which covers approximately 590 km<sup>2</sup> and belongs to  
137 the Fiume Simeto catchment. The studied river originates from the slopes of Monte Moliano e Montagna

138 on the border of the territory of the Municipalities of Aidone and Piazza Armerina. The main stretch of  
139 Fosso del Tempio is approximately 30 km long and after the first main confluence, it changes its name to  
140 Fosso Pietrarossa. To our knowledge there is no information regarding the average discharge of Fosso  
141 del Tempio.

142 A total of 27 sites were visited, with 18 being sampled both seasons, partially due to intermittency of parts  
143 of the studied river system, resulting in two sites (A6, E9) being completely dry during autumn sampling  
144 (Fig. 1, Tab. S1). To more broadly assess regional diversity, nine additional sites from neighbouring  
145 catchments were sampled at least in one season (Fig. 1). For sampling, a sterile 1 l bottle was used.  
146 Depending on the size of the stream, the water was taken either from the water surface at a single spot (1  
147 l), or from each side of the stream (2x 0,5 l). All sampling was done against the flow direction wearing  
148 single-use nitrile gloves. Subsequently, samples were filtered on-site using a vacuum pump (Druck-  
149 Vakuumpumpe Typ:00A7.400 12V DC, Industrievertretung Neubauer) and a nitrocellulose filter (0.45 µm  
150 pore size, VWR, 513-1454). At each filtration location, a field blank (left open on the equipment for 30  
151 seconds) was included and further processed with the other samples. If weather conditions did not allow  
152 for on-site filtration, samples were stored in a cooling box (4 °C) and filtered later during the same day  
153 (maximum 5 hours after sampling). If the filter clogged during filtration, a second, or third filter was used  
154 (Tab. S1). After filtration, the filters were folded with sterile tweezers and transferred into 1.5 ml  
155 Eppendorf tubes filled with 96% technical ethanol. Filters were immediately put into transportable ice  
156 boxes (<0°C) and within a few hours after sampling stored at -20 °C until DNA extraction.

#### 157 *DNA extraction and purification*

158 All laboratory work was conducted under sterile conditions in a specialized laboratory ('eDNA lab') that is  
159 only used for work on eDNA, regularly sterilized using UV light and with the air filtered with a HEPA 13  
160 filter. Full body protective clothing was used (disposable overalls, facemasks, gloves, shoe covers) and  
161 the laboratory was irradiated with UV light prior to all working steps. Handling of the samples (DNA  
162 extraction; PCR) was conducted under independent UV hoods. First, the filters were taken from the  
163 ethanol and laid out in sterile petri dishes to dry for 15 to 20 hours. The petri dishes were covered with  
164 aluminium foil to protect them from UV irradiation in the eDNA lab. After drying, the filters were ripped into  
165 6 to 7 pieces and transferred into 2 ml Eppendorf tubes containing 610 µl of lysis buffer (600 µl TNES and  
166 10 µl Proteinase K (10 mg/ml)). DNA extraction was then conducted using a salt extraction protocol as  
167 described in Weiss and Leese (2016). Around 10 to 18 samples were extracted together. The field blanks  
168 were randomly distributed among sample batches and treated like normal samples in extractions.

169 Prior to DNA purification, 1 µl RNase (10 mg/ml, ThermoScientific, EN0531) was added to each sample  
170 and incubated at 37 °C for 30 minutes to remove RNA. After incubation, DNA was purified using the  
171 MinElute<sup>®</sup> Reaction Cleanup Kit (Qiagen). All eDNA samples, where more than one filter had been used  
172 (Tab. S1) were pooled during purification by loading them onto the same column. After DNA purification,  
173 68 DNA samples were retained for further processing (including negative filters). Purified DNA was  
174 resuspended in 20 µl nuclease-free H<sub>2</sub>O and stored at -20 °C. The DNA concentration was measured  
175 using the Qubit 2.0 (dsDNA High Sensitivity Array, Thermo Fisher Scientific, Beverly, USA)

## 176 *PCR amplification*

177 A 205 bp long fragment of the cytochrome c oxidase subunit 1 (COI) mitochondrial gene was amplified  
178 using the fwh2 primer set (fwhF2 + fwhR2n) (Vamos et al. 2017) and the Multiplex PCR Plus Kit (100)  
179 (Qiagen GmbH). A two-step PCR protocol was employed, the first step with the untagged fwh2 primers  
180 and the second step with tagging primers (Leese et al. 2021).

181 To account for PCR stochasticity and to increase consistency of the results, two PCR replicates were  
182 processed for each sample (Zizka et al. 2019). In the first step, 1 µl of DNA was amplified in a 25 µl  
183 reaction (12.5 µl of the Multiplex Mastermix, 2.5 µl Color Dye, 0.25 µl fwh2F1 (10 mmol), 0.25 µl fwhR2n  
184 (10 mmol) and 8.5 µl PCR H<sub>2</sub>O). The cycling conditions for the first step were split into two parts, starting  
185 with 5 minutes at 95 °C for initial denaturation, followed by 10 cycles of a temperature step-down PCR  
186 (1°C per cycle) lasting 30 seconds going from 68 to 58°C, followed by final elongation for 30 seconds at  
187 72 °C. The second part consisted of 25 cycles of 95°C for 30 sec, 58°C for 90 sec, and 72° for 30 sec.  
188 Final elongation was conducted for 10 minutes at 68 °C.

189 In the second PCR step, tagging primers were added. Each sample and each replicate were given a  
190 unique primer combination via a tag added to the PCR amplification primer to bioinformatically assign  
191 sequences to their original sample after sequencing (Tab. S2). The second PCR step was conducted with  
192 1 µl of the the product from the first PCR step, 12.5 µl of the Multiplex Mastermix, 2.5 µl Coral Color Dye,  
193 0.25 µl forward tagging primer (10 µM), 0.25 µl reverse tagging primer (10 µM) and 8.5 µl PCR H<sub>2</sub>O.  
194 Cycling conditions were as follows: 95°C for 5 minutes for initial denaturation, then 20 cycles of 95°C at  
195 30 sec and 72°C for 120 sec with a final elongation at 68°C for 10 minutes.

196 The PCR success was checked using a 1% agarose gel and the products were measured with both the  
197 Qubit (2.0) High Sensitivity kit and the Fragment Analyzer™ Automated CE System (Advanced Analytical  
198 Technologies GmbH) using the NGS Standard Sensitivity Kit, before equimolar pooling (SequalPrep  
199 Normalization Plate, Applied Biosystems, Foster City, CA, USA). Residual primers were removed with a  
200 left sided SPRIselect size selection (Beckman Coulter, ratio: 0.76x). The final library was sent to  
201 MacroGen Europe and paired-end sequenced on one HiSeq X Illumina Lane (read length 2 x 150 bp). To  
202 increase sequence diversity, 5% PhiX were added by the sequencing company.

## 203 *Bioinformatic analyses*

204 Raw reads for the two libraries were received from MacroGen as demultiplexed fastq files. The  
205 sequencing data was processed using a pre-release version of the graphical-user interface pipeline  
206 MetaProcessor (available at <https://github.com/TillMacher/MetaProcessor>). First, the quality of the raw  
207 reads was checked using FastQC (Andrews 2010). Subsequently, samples were renamed using a  
208 custom python script (Metaprocessor: rename\_samples.py). Paired-end reads were merged using  
209 VSEARCH version 2.11.1 (Rognes et al. 2016), allowing for 25% differences between merged pairs and a  
210 minimum overlap of 20 bp. Afterwards, primers were trimmed using cutadapt version 2.8 (Martin 2011),  
211 using the linked adapter option without anchoring. Reads were then filtered by length (195-215 bp  
212 threshold for fwh2 target fragment) and by maximum expected error (maxee = 1), using VSEARCH. The

213 filtered reads were dereplicated with singletons and chimeras removed with VSEARCH. All reads were  
214 then pooled using a custom python script and globally dereplicated (MetaProcessor:  
215 v\_derep\_singletons\_uchime.py). Sequences were denoised into exact sequence variants (ESVs), using  
216 VSEARCH's '--cluster\_unoise' function, with a minimum size of 8 and an alpha value of 2. The ESVs  
217 were remapped (usearch\_global function, 100% similarity) to the individual sample files to create the read  
218 table. Taxonomic assignment of ESVs was conducted using BOLDigger version 1.1.10 (Buchner and  
219 Leese 2020) and the Barcode of Life data system (BOLD) database (Ratnasingham and Hebert 2007).  
220 The option "JAMP filter" was applied to extract the final taxonomy table.  
221 Downstream processing of the dataset was conducted using TaxonTableTools (TTT) version 1.3.0  
222 (Macher et al. 2021a). First, the full taxonomy table was processed for replicate consistency, where only  
223 ESVs present in both replicates were retained by using 'merge replicates' option. Afterwards, the resulting  
224 TaXon table was filtered using a read-based filter with 0.0005% threshold filtering. Using such a low  
225 threshold value was possible due to the high number of reads obtained combined with the dual indexing  
226 strategy (same index in i7 and i5 read) and lack of reads in negative controls, ensuring high reliability of  
227 data with preserving the records of rare taxa observed. The final filtering step included removal of  
228 taxonomically unmatched ESVs. General patterns of diversity were studied based on read proportion pie  
229 charts generated on phylum and order level. The resulting charts were superimposed on circular  
230 neighbor-joining phylogenetic trees based on p-distance generated with MEGA7 software (Kumar et al.  
231 2016). To investigate seasonal patterns, the TaXon tables including autumn and winter samples were  
232 compared by generating Venn diagrams. In order to evaluate the effect of in-stream barrier, the TaXon  
233 tables were first converted to presence-absence (p/a) tables and subsequently, beta-diversity heatmaps  
234 and 3D Principal Coordinate Analysis (PCoA) charts were generated and the respective ANOSIM  
235 (analysis of similarities) R values were analysed. In principle, the ANOSIM is an analysis of variance  
236 using the average measures of dissimilarity (in this case Jaccard distances) in species composition,  
237 comparing them between and within given samples. Resulting test statistic value R usually range  
238 between 0 and 1, where values close to 1 generally support the sample dissimilarity contrary to values  
239 close to 0 which indicate no differences (Chapman and Underwood 1999; Clarke 1993). Finally, to  
240 visualize species distribution, Site Occupancy plots and Parallel Categories (ParCat) diagrams were  
241 produced.

242

#### 243 *Datasets for analyses*

244 The final dataset comprising all ESVs remaining after quality filtering ('All ESVs' dataset) was  
245 subsequently filtered for ESVs assigned to macroinvertebrates which are recognized as freshwater taxa,  
246 including also ones which are considered amphibiotic with a larval stage being confined to freshwater  
247 habitats ('MZB ESVs' dataset). Taxonomic filtering was performed according to taxa information stored in  
248 the Global Biodiversity Information Facility (GBIF) and World Register of Marine Species (WoRMS)  
249 databases. Freshwater macroinvertebrate taxa identified as potentially new for Sicily were cross-validated  
250 with the publicly available checklist of Italian Fauna (Latella et al. 2007) as well as species' distribution  
251 maps in GBIF database (which, however, may also contain some unvalidated entries). Out of all ESVs

252 assigned to freshwater macroinvertebrates, ESVs belonging to the same species were grouped together  
253 and represented by a single entry on species level for the final dataset ('MZB species' dataset).  
254 Furthermore, depending on the research question, the number of sampling sites for certain analyses  
255 varied. Thus, for analyses of the seasonal differences, only the sites, which were sampled both seasons  
256 were used (= 18 sites; Fig. 1). For analyses of possible barrier effects, only the sites from the Fosso del  
257 Tempio systems were used (highlighted in green and violet in Fig. 1), regardless if the site was visited  
258 both seasons or not, since the data for the barrier effect were analysed separately for each season. The  
259 downstream dataset consisted of nine sites of the Fosso del Tempio system, which were sampled in both  
260 seasons. The upstream dataset varied between seasons with seven sites being included in autumn and  
261 six in winter. There were five core upstream sites included in both seasons with three sites being sampled  
262 only in one season (A11, A18 in autumn and E9 in winter; Fig. 1). The downstream site A6, sampled only  
263 in winter, was excluded from the dataset given very low observed ESV/species numbers, pointing to  
264 potential strong effects of non-perennial flow, which could introduce a strong bias in barrier analysis. All  
265 filtering steps described above were conducted using taxon-based and sample-based filtering options in  
266 TTT software.

267

## 268 **Results**

269 We obtained 445,683,202 raw read pairs, which also included reads of a second library with a different  
270 primer that was run in parallel on the same sequencing run. After paired-end merging, 232,498,448 reads  
271 were retrieved from fwhF2+fwhR2n primer pair. After the final quality filtering step 120,167,492 raw reads  
272 remained (31,900 reads assigned to negative controls), which were denoised into 7888 ESVs out of  
273 which 7745 could be taxonomically assigned. The subsequent merging of the PCR replicates retained  
274 110,605,585 reads (no reads present in negative controls). The final read table (corresponding to 'All  
275 ESVs' dataset; Tab. S3) obtained after 0.0005% threshold filtering and removal of taxonomically  
276 unmatched ESVs, consisted of 110,148,185 reads, which were assigned to 7331 ESVs. Only around  
277 6.5% (= 474) of all ESVs could be assigned to species level, resulting in 340 unique species. Taxonomic  
278 filtering for freshwater macroinvertebrates resulted in a read table consisting of 14,868,364 reads,  
279 assigned to 466 ESVs ('MZB ESVs' dataset; Tab. S4). Nearly 36% of macroinvertebrate ESVs (= 167)  
280 could be assigned to species level with 98 unique freshwater macroinvertebrate species retrieved.

## 281 ***General patterns of diversity***

282 The ESVs belonging to the 'All ESVs' dataset could be assigned to 29 phyla, with the highest proportion  
283 of reads as well as the highest number of ESVs being assigned to Arthropoda (Fig. 2). Apart from  
284 Arthropoda, high numbers of ESVs were retrieved for Heterokontophyta, Ochrophyta and Bacillariophyta.  
285 Altogether, above 40% of reads were assigned to non-metazoan taxa (Fig. 2). The majority of all species  
286 were assigned to Arthropoda, with Heterokontophyta and Annelida being the only other phyla with more  
287 than 10 species retrieved. Less than 0.5% of all reads consisted of 134 ESVs belonging to 15 phyla, both  
288 metazoan and non-metazoan.



289 The ESVs of the 'MZB ESVs' dataset were assigned to 13 orders, with nearly 65% of reads belonging to  
290 dipteran ESVs, which were also characterized by highest ESV and species diversity (Fig. 2). Next most  
291 read-abundant macroinvertebrate orders were amphipods and haplotaxidan annelids. More than 4% of  
292 reads were assigned to 102 poriferan ESVs, none of which could be assigned to species level with four  
293 being assigned to orders Bubarida and Desmacellida, respectively (Tab. S4). Nearly 10% of all  
294 macroinvertebrate ESVs (22 species of five orders) comprised less than 1% of reads.

#### 295 *Temporal turnover*

296 The number of ESVs or species detected was higher in autumn than in winter regardless of the dataset,  
297 with a minor fraction of shared species/ESVs (Fig. 3). In the 'All ESVs' dataset, 4698 ESVs were retrieved  
298 in autumn and 2554 in winter, with 1288 ESVs being shared between seasons. In the 'MZB ESVs'  
299 dataset, 337 ESVs and 170 ESVs were retrieved in autumn and winter, respectively, with 118 shared  
300 between seasons. In the 'MZB species' dataset, 72 species were detected in autumn and 37 in winter,  
301 with 29 species found in both seasons. Less than half of the ESVs and macroinvertebrate species were  
302 found in winter compared to autumn, regardless of the dataset composition. The proportion of shared  
303 entities varied between approaches. In general, the percentage of shared diversity was inversely  
304 proportional to the broadness of the dataset, regardless of season analysed. In autumn, the proportion of  
305 diversity shared varied between roughly 27.4% for 'All ESVs' to 40.3% for 'MZB species', whereas in  
306 winter it ranged from 50.4% for 'All ESVs' to 78.4% for 'MZB species'.

#### 307 *Barrier effect*

308 We found strong community structuring across the barrier in autumn for all three datasets analysed (Fig.  
309 4). ANOSIM R values (measure of average dissimilarity) were all highly significant ( $p < 0.001$ ) and ranged  
310 from 0.427 in 'All ESVs' dataset to 0.593 in 'MZB ESVs' dataset. In contrast, no significant differences  
311 were found for any of the datasets in winter, where ANOSIM R values varied from 0.08824 in 'MZB  
312 species' dataset up to 0.1565 in 'MZB ESVs' dataset ( $p < 0.05$ ). This pattern was also reflected by the  
313 average Jaccard distances obtained per site (Fig. 4A, Tab. S5) as they were generally higher between  
314 sites across the barrier than on each side of the barrier regardless of season, except for upstream sites  
315 during winter. Considering individual sites, the Jaccard distances were on average higher across the  
316 barrier than within a stream section, with exception of two sites in autumn (A6F in 'MZB ESVs' and A1 in  
317 'All ESVs' datasets) and 8 sites in winter (E3, E4, E5, A6F, E8, E9, A7 and A15 across various datasets;  
318 Tab. S5). However, the differences in the Jaccard distances between stream sections compared to sites  
319 within a stream section were more pronounced in autumn compared to winter. These results are further  
320 supported by the PCoA analyses performed on all sites within a stream section. In autumn clear  
321 separation between samples from downstream and upstream can be observed, when in winter there was  
322 no clear distinction between samples from the opposite sides of the in-stream barrier (Fig. 4B). Moreover,  
323 the direct comparison of sites closest to the in-stream barrier (E5 from the downstream and E8 from the  
324 upstream) indicate the proportion of diversity shared between those sites varies between seasons. In  
325 autumn, Jaccard distances ranged from 0.89 to 0.91, whereas in winter the values were between 0.67  
326 and 0.76. The value of 1 obtained for those sites when using 'MZB species' dataset in winter should be

327 treated with caution, since it is a result of no ESVs assigned to species level on site E5. A similar pattern  
328 can be observed in the proportion of shared diversity which ranges from 9% in case of 'MZB ESVs' to  
329 10.5% for 'MZB species' whereas in winter it ranges from 23.5% in case of 'MZB ESVs' to 32.6% in 'All  
330 ESVs', with the exception of MZB species where none of seven ESV could be assigned to species level  
331 in site E5 (Fig. S1).

332

### 333 ***Macroinvertebrate species composition and distribution***

334 Apart from looking at the diversity statistics, we also analysed the observed macroinvertebrate species  
335 composition as well as the seasonal turnover, including the potential effect of the barrier on species  
336 diversity. The distribution of the 98 freshwater macroinvertebrate species reported in the 'MZB species'  
337 dataset differed between seasons (Fig. 5A) and stream sections (Fig. 5B, C). Overall 32 of the 98  
338 freshwater species were shared between Fosso del Tempio and neighboring streams, 52 species were  
339 exclusive to Fosso del Tempio and 14 to the neighbouring streams (Fig. S2). We identified 28 species  
340 potentially new for Sicily: 23 dipteran, 3 annelid, 1 caddisfly and 1 water beetle species, respectively (Tab.  
341 S6). Ten of them were found exclusively in the neighboring catchments.

### 342 *Temporal turnover*

343 Regarding seasonality (Fig. 5A), there were 72 species found in autumn and 37 species found in winter  
344 with 29 retrieved in both seasons. Nearly half of all species found were dipterans. Over 40% of all species  
345 found in each season were only retrieved from a single site with mayfly *Cleon dipterum* being the most  
346 widespread species in autumn and *Echinogammarus sicilianus* being retrieved from most sites in winter.  
347 Notably both amphipod species and the only snail species were found both seasons along with nearly all  
348 caddisfly species (Tab. S7). On the contrary, most dragonflies and water beetles were observed in  
349 autumn, whereas two mayflies and a freshwater shrimp were retrieved only in winter.

### 350 *Barrier effect*

351 In autumn, 55 of the total 77 species were found in the downstream and 45 in the upstream section  
352 relative to the barrier, with 23 being shared between the sections (Fig. 5B). In the downstream sites  
353 eDNA detections of two species were retrieved from all sites: *Cleon dipterum* and *Echinogammarus*  
354 *adipatus*, whereas in the upstream *Echinogammarus sicilianus* and the chironomid *Parametriocnemus*  
355 *stylatus* were recorded from each site. Over 50% of the species detections were from single sites only. In  
356 winter, 28 of the total 33 species detected via eDNA in the Fosso del Tempio river system were found  
357 downstream of the barrier and 13 upstream with 8 shared between sections (Fig. 5C). Similarly to  
358 autumn, *Echinogammarus sicilianus* was retrieved from all sites in the upstream, whereas no species was  
359 recorded from all downstream sites with *Simulium intermedium* recorded from all sites but one. Again, in  
360 both stream sections the majority of species was recorded from single sites only. Interestingly, regardless  
361 of the season, most caddisfly species, along with only hemipteran, were found in the upstream sections

362 only, whereas most dragonflies and water beetles were retrieved downstream of the barrier (Tab. S7).  
363 Notably both amphipod species were found on both sides of the barrier in both seasons.

364

## 365 **Discussion**

### 366 *Observed diversity - freshwater macroinvertebrates and beyond*

367 By using eDNA metabarcoding, we detected the presence of 98 freshwater macroinvertebrate species  
368 from the Fosso del Tempio river system and its neighboring catchment. The detected diversity counts for  
369 approximately 5% of all freshwater macroinvertebrate species known from the island (Latella et al. 2007;  
370 Ruffo and Stoch 2006). To the best of our knowledge, no freshwater macroinvertebrate biomonitoring  
371 data for Fosso del Tempio exist and thus, it is hard to estimate what fraction of the local diversity we were  
372 able to retrieve. However, given that a relatively small portion of Sicily's hydrological network was covered  
373 with this study, the number of macroinvertebrate species retrieved is quite high. Moreover, taking into  
374 consideration that nearly 65% of obtained diversity could not be assigned to species level, the detected  
375 diversity is even higher. The majority of all freshwater macroinvertebrate species detected are arthropods,  
376 which were also the most dominant group in terms of read abundance. Among arthropods, the most  
377 dominant order in terms of both read abundance and diversity was Diptera. This result was to be  
378 expected since nearly half of all freshwater macroinvertebrates reported from Sicily belong to this order  
379 (Latella et al. 2007; Ruffo and Stoch 2006). It is also in agreement with other eDNA-based bioassessment  
380 of freshwater macroinvertebrates, where dipteran representatives are among the most dominant groups  
381 (Fernández et al. 2019; Leese et al. 2021). Within Diptera, we have detected 21 species belonging to the  
382 ecologically important family Chironomidae, which along with 12 species of 'so-called' EPT  
383 (Ephemeroptera, Plecoptera, Trichoptera) taxa, could serve as a basis for estimating the ecological state  
384 of the freshwater ecosystem in Fosso del Tempio river system (Wallace et al. 1996). Notably, we have  
385 also detected the presence of a single freshwater snail, the highly invasive snail *Physella (Physa) acuta*,  
386 known from Sicily already since the mid-19th century (Vinarski 2017). Since it was also the only snail  
387 species found, we have considered a possibility of primer bias towards inadequate amplification of  
388 molluscan DNA. However, after evaluating the primer binding for ten out of approximately 23 freshwater  
389 snail species known from Sicily (Ruffo and Stoch 2006), for which DNA information was available, we  
390 excluded that possibility since all of them could be hypothetically amplified with used primers  
391 (unpublished data). Absence of other snail taxa could be also resulting from low amounts of DNA shed in  
392 the environment either due to hard shell structure also possibly combined with very low numbers of  
393 individuals, which largely influence the detectability of an eDNA signal (Harrison et al. 2019; Stewart  
394 2019). However, given we were still able to detect considerable diversity of taxa that bear hard carapax  
395 like crustaceans or water beetles, it could be rather due to the low number of individuals present. On the  
396 other hand, the observed low gastropod diversity could possibly indicate that invasive *P. acuta* have  
397 outcompeted other native snail species as already documented in other parts of the world (Dobson 2004;  
398 Zukowski and Walker 2009). This hypothesis is difficult to verify though, since no data on historical  
399 freshwater snail diversity in Fosso del Tempio is available. However, since *P. acuta* was only detected in

400 relatively few samples, it might indicate either low abundance of snail species or low amount of DNA shed  
401 to the water.

402 In some cases, we also noticed a high level of intraspecific diversity, particularly in three species where  
403 more than 10 ESVs were ascribed to a single taxon namely a chironomid *Cricotopus bicinctus*, a simuliid  
404 *Simulium rubzovianum* and an amphipod *Echinogammarus sicilianus*. Those findings confirm prior  
405 observation in all three taxa indicating already high degree of intraspecific diversity, in case of *E.*  
406 *sicilianus* the presence of potential cryptic diversity (Hupało et al. 2021; Sari et al. 2012; Sinclair and  
407 Gresens 2008). Interestingly, we have detected 28 species that to our knowledge, were not reported from  
408 Sicily before, indicating they might represent taxa potentially new for Sicily. Most of them belong to  
409 dipteran families Chironomidae, Simuliidae, Culicidae, Limoniidae, Dixidae, Empididae, Tipulidae and  
410 Muscidae with all species known to have an aquatic larval stage. Most of those species are known to  
411 occur in the Mediterranean basin indicating they might represent formerly overlooked valid records.  
412 However, five of them: *Culex inconspicuus*, *Gonomyia tenella*, *Limnophora olympiae*, *Simulium*  
413 *ruficorne* and *Stempellinella ciliaris* were not reported from vicinity of Mediterranean basin with known  
414 occurrence data coming from Central and Northern Europe as well as Central and Southern Africa,  
415 indicating that those might represent false positive signals. Those false positives might result from  
416 mistakes present in public databases including incorrect synonyms and wrong sequence entries among  
417 others (Pentinsaari et al. 2020), which could contribute to observed records despite BOLDigger strategy  
418 to use the most common species across the most frequent of the most similar identification hits to  
419 enhance reliability of the record (Buchner and Leese 2020). Regarding other taxa, which might be new  
420 records for Sicily, there are three aquatic oligochaetes (*Dero furcata*, *Nais christinae*, *Nais elinguis*), all  
421 reported from the Mediterranean basin, one elmid beetle *Limnius volckmari* also occurring in the  
422 Mediterranean with a population on Corsica and one caddisfly *Hydropsyche instabilis* reported also from  
423 southern Italy. Although all of those occurrences might represent valid new records, one should treat  
424 them with extreme caution, since there were no actual specimens observed or collected from the sites,  
425 indicating that these require further investigation.

426 Our target organism group - freshwater macroinvertebrates - comprised 467 ESVs, which reflected about  
427 6.5% of all ESV diversity obtained in this study. Although the vast majority of the remaining 6864 ESVs  
428 could not be assigned to species level, they still provide valuable information about the ecosystem  
429 surrounding the Fosso del Tempio system. We have retrieved traces of multiple entities of diatoms, other  
430 unicellular algae as well as heterotrophic and mixotrophic protists and fungi. Although only some could be  
431 assigned to species level, most of them could be resolved to higher taxonomic levels only, like phyla or  
432 classes. Since COI is suggested as barcoding region primarily for metazoans, in many cases the  
433 taxonomic assignment could probably be resolved better if other, group-specific molecular markers would  
434 be used e.g. rbcL, 18S rDNA or ITS (Evans et al. 2007; Pawlowski et al. 2012; Schoch et al. 2012). We  
435 have also retrieved DNA traces of several terrestrial arthropod species including 27 dipterans, 26  
436 butterflies, 21 true bugs, 20 beetles, 12 hymenopterans, seven spiders, five orthopterans, five  
437 collembolans and a single mantid, phasmid, lacewing, bark lice and isopod. There was also a significant  
438 amount of information deriving from the freshwater organisms, which we did not consider as our target

439 group. We have also observed DNA signals coming from the planktonic biota including five rotifers and  
440 two *Hydra* species. Moreover, the DNA trace of common carp (*Cyprinus carpio*) was retrieved from a  
441 single site. Interestingly, *C. carpio* established stable wild populations in inland waters of Sicily and is  
442 considered parautochthonous since being introduced supposedly by Romans (Marrone and Naselli-  
443 Flores 2015). It is likely representing a valid record since results obtained using fish-specific 12S marker  
444 (Taberlet et al. 2018) from the same sites confirmed its presence (Hupało et al. unpublished results).  
445 Altogether, the information included in the non-target part of the dataset obtained might provide valuable  
446 information about the surrounding ecosystem. More and more studies indicate the significance and  
447 validity of information contained in so-called bycatch derived from aquatic eDNA data (Macher et al.  
448 2021b; Mariani et al. 2021). Thus, including and sharing the entire eDNA sequence dataset could be of  
449 paramount importance for further studies from the region and effort should be made towards their storage  
450 and public availability (Berry et al. 2020; Makiola et al. 2020). On the other hand, we have also retrieved a  
451 number of ESVs that represent obvious false positive records e.g. including ones that were taxonomically  
452 assigned to Echinodermata, a phylum that is known only to occur in marine waters. However, given the  
453 low level of genetic identity going below 80%, one could likely treat it as misidentification rather than a  
454 contamination, especially considering that no DNA signals were retrieved from negative controls.  
455 Regardless, one still should treat the records mentioned above with caution, because even though many  
456 of them could represent valid records, some of them might be deriving from sequencing errors and/or be  
457 a result of misidentification due to faultiness and incompleteness of reference databases.

458

#### 459 *Insight into seasonality and barrier effect*

460 Our results obtained with eDNA-based information provide an insight into the dynamics of the Fosso del  
461 Tempio river system. By conducting sampling campaigns in both autumn and winter seasons, we were  
462 able to investigate seasonal patterns of freshwater macroinvertebrate diversity. We observed more than  
463 twice as many macroinvertebrate species in autumn compared to winter. This result is to some degree  
464 unexpected. Even though differences in species composition in the Mediterranean region could be  
465 partially attributed to a high degree of water level fluctuation observed between arid summer and wet  
466 winter, the species richness is expected to remain similar between seasons (Bonada and Resh 2013;  
467 Gasith and Resh 1999). Given that samples were collected in September, at the end of dry season in  
468 Sicily and in January, which marks approximately the middle of wet season, the habitat and resource  
469 availability for aquatic biota are very different. This should reflect the changes in species' assemblages  
470 and dominances, however the majority of species should be evolutionarily adapted to those varying  
471 conditions, resulting in certain similarities in species diversity between seasons (Gasith and Resh 1999).  
472 One of the reasons behind observed patterns could be visibly higher water levels during winter sampling.  
473 This could also have an indirect effect on lower diversity observed with the DNA concentration being  
474 more diluted and thus, less taxa being retrieved. That being said, with a relatively high number of species  
475 shared between seasons, one may assume that at least some of taxa reported only from autumn could in  
476 fact also occur on sites in winter and could be retrieved if a higher water volume was sampled

477 accordingly. On the other hand, there were eight species that were only retrieved from winter samples.  
478 Although in some cases like *Eukiefferella claripennis*, *Limnius volckmari* and *Tipula lateralis*, it seems to  
479 be the case of rarity of those taxa in autumn since they were only retrieved locally, other cases might  
480 show some true seasonal patterns. In case of mayflies *Baetis pavidus* and *Caenis pusilla* a possible niche  
481 overlap with *Caenis luctuosa* mediated with supposed seasonal fluctuations might be the reason behind  
482 observed species presence in close-by sites in autumn and winter. The same could be true for the water  
483 beetle *Agabus brunneus* 'replacing' *Agabus bipustulatus* on site A12 in winter compared to autumn.  
484 Interestingly, we have also retrieved an eDNA signal from freshwater shrimp *Atyaephyra desmarestii*,  
485 native to Mediterranean region. The retrieved information from winter eDNA sampling corresponds with  
486 the observations made in the field where numerous specimens were observed only during winter  
487 sampling with no specimen collected in autumn. Although the species is known to have strong seasonal  
488 fluctuations (Dhaouadi-Hassen and Boumaiza 2009; Fidalgo et al. 2015; Schoolmann et al. 2015), the  
489 species' abundance should be higher in autumn compared to winter. Since the opposite is the case here,  
490 this puzzling observation likely requires further investigation.

491 Our data also indicate that the concrete weir present in the stream course might have an effect on  
492 dispersal of resident aquatic taxa. There are numerous studies confirming that weirs may act as barriers  
493 for macroinvertebrate dispersal significantly reducing both connectivity and observed species diversity on  
494 the opposite sites of the barrier (Brooks et al. 2018; Poff and Zimmerman 2010). The effect seems to be  
495 even more profound when there is a high degree of water level fluctuations, which is often the case in  
496 Mediterranean streams. Here, we observed a significant change of water level and flow velocity between  
497 dry and wet seasons. During sampling conducted in September we have seen virtually no water going  
498 through the weir, whereas in winter with the higher water level the change in amount of water flowing  
499 through was clearly visible, although flow was still disrupted by the barrier. This effect seems to be  
500 reflected by the results of similarity-based analyses with a clear distinction between the observed diversity  
501 in the downstream and upstream samples during dry season compared to wet season, where no visible  
502 difference can be observed. This is also reflected in the proportion of species that were found only in the  
503 upstream catchment between seasons with a much lower percentage of species uniquely found in the  
504 upstream in winter compared to autumn. A similar pattern was found when comparing diversity observed  
505 on two border sites separated by the barrier, where a comparatively higher proportion of diversity was  
506 shared between those sites in winter compared to autumn. Although, any species-related comparisons  
507 between the seasons has to be taken with caution due to various reasons described above, the observed  
508 effect of an in-stream weir could have significant implications for observed diversity in the Fosso del  
509 Tempio system. Based on our results, the weir seems to hinder the connectivity between upstream and  
510 downstream parts of the system with a portion of taxa being found on both sides of the barrier.  
511 Regardless of season, the majority of taxa shared between stream sections are the hemilimnic ones with  
512 flying adult stages. Increased dispersal ability in flying insects with aquatic larvae has been proven to be  
513 important in terms of observed patterns of diversity in a stream ecosystem with high degree of similarity  
514 between river sections regardless of any possible barriers (Hughes et al. 2009). Similarly, the opposite is  
515 true for the species with lower dispersal abilities with more fractionated and restricted patterns of genetic  
516 diversity. In such cases, the in-stream barriers might lead to genetic differentiation leading to strong

517 population structuring and in some cases, to allopatric speciation. We have observed a similar case in our  
518 data, where certain ESVs of *Echinogammarus sicilianus*, a freshwater amphipod with limited dispersal  
519 abilities, are present only in the downstream or upstream section of the Fosso del Tempio, regardless of  
520 the season. This finding might indicate that the intraspecific diversity observed might, at least partially, be  
521 resulting from the effect of the in-stream weir.

522

### 523 *Different approaches, similar results - ESV vs. species comparability*

524 The results regarding the seasonality patterns and the effect of the in-stream barrier obtained with  
525 macroinvertebrate species-based approach were similar to the ones obtained with all macroinvertebrate  
526 ESVs including more than 60% of all macroinvertebrate ESVs which could not be assigned to species  
527 level. Although notable progress in DNA barcoding of aquatic biota has been made in recent years, there  
528 is still a significant amount of data missing in reference databases (Weigand et al. 2019). The difference  
529 in freshwater macroinvertebrate barcode coverage varies between different regions due to unbalanced  
530 efforts taken in filling the missing gaps. Our results indicate that Sicily freshwater macroinvertebrates  
531 seem to be relatively underrepresented with only 35% of our dataset being assigned to species level,  
532 compared to European average of approximately 64.5% freshwater macroinvertebrate species having at  
533 least a single barcode publicly available (Weigand et al. 2019). In those cases, ESV-based approaches  
534 could provide an alternative solution for studying freshwater ecosystem dynamics. This seems to be also  
535 of particular importance for research based on organisms where taxonomy is complex and not fully  
536 resolved like diatoms where the use of ESVs has been successfully implemented (Tapolczai et al. 2019).  
537 Moreover, considering ESVs provides a finer level of detail to observed diversity by providing an insight  
538 also into intraspecific diversity, which is discarded when species or clusters serving as species proxy (e.g.  
539 OTUs) are considered (Tapolczai et al. 2021; Zizka et al. 2020). This could be of paramount importance  
540 when considering phylogeography or population genetics of observed taxa (Antich et al. 2021; Turon et  
541 al. 2020).

542 Since the primers used in this study amplify a broad range of taxa groups and given that  
543 macroinvertebrate diversity represented only a fraction of all retrieved ESVs, we have also decided to  
544 look at the results obtained with an approach where all generated diversity will be taken into  
545 consideration. Surprisingly, despite taxonomic broadness of the dataset, including also a high portion of  
546 non-freshwater biota, the results obtained were similar to those obtained only with macroinvertebrate  
547 data. This finding seems particularly interesting pointing out the high sensitivity and reproducibility of  
548 generated results. Even though the results deriving from this general approach should be looked at with  
549 increased awareness, they still can inform about community connectivity or seasonality patterns in a  
550 stream ecosystem.

551

### 552 **Conclusions**

553 Our results provide a first insight into freshwater diversity and community dynamics of the Fosso del  
554 Tempio river system in Sicily, used as an exemplary Mediterranean insular freshwater ecosystem. We  
555 showcase the potential that comes with using eDNA metabarcoding for studying freshwater ecosystems,  
556 even in understudied regions with still significant portions of genetic information missing like the  
557 Mediterranean islands. Based on our findings, an ESV-based approach provides a promising, highly  
558 reproducible approach for studying freshwater community patterns and dynamics even - or in particular -  
559 in highly understudied regions. By providing reproducible taxonomic units, data could be easily reused in  
560 the future with new regional biodiversity data added and with increasing completeness of local reference  
561 databases. Hence, we highlight the need for a unified digital storage and access solution, which could  
562 ensure the public availability of the data at both regional and international level. Specifically for regions  
563 with non-perennial flows, hydrological differences between seasons need to be considered and  
564 incorporated in bioassessment planning, sampling and interpretation. We stress the importance of proper  
565 sampling design taking into consideration seasonality and equal representation of sites across the entire  
566 river system to maximize the representation of the regional community and its dynamics.

567

#### 568 **Data Accessibility**

569 The data is publicly available in the European Nucleotide Archive (PRJEB45583).

570

#### 571 **Acknowledgements**

572 We would like to thank Marie-Thérèse Werner and Pedro M.G. Gomes for their valuable help during the  
573 sampling campaigns. We would also like to thank Fabio Stoch for providing in-depth information about the  
574 studied river system. We also thank Bernd Sures, Daniel Grabner, Diego Fontaneto for the logistic  
575 support and Florian Altermatt, Michał Grabowski, Alexander Weigand and Hannah Weigand for helpful  
576 discussions throughout the project.

577 This research was funded by German Research Foundation (DFG) (project LE 2323/9-1).

578

#### 579 **Figure captions**

580 **Fig. 1** Map of sampling locations in the Fosso del Tempio system and neighbouring streams. Pictures on  
581 the left show sampling site E5 with the potential in-stream barrier in autumn and in winter.

582 **Fig. 2** Read proportion charts with taxonomic composition, the number of ESVs assigned to a certain taxa  
583 group (phylum level for all ESVs; order level for freshwater macroinvertebrates\*) and the number of  
584 unique species assigned to ESVs. Upper graph shows the read proportions for the entire dataset and



585 lower graph read proportions in the freshwater macroinvertebrate dataset. \*Since most ESVs assigned to  
586 Porifera could not be assigned to order level, they were kept to phylum level respectively.

587 **Fig. 3** Venn diagrams showing number of species or ESVs detected in the autumn and winter samples as  
588 well as the fraction of shared species/ESVs between seasons for the three datasets analysed.

589 **Fig. 4** Diversity analyses evaluating the impact of the potential in-stream barrier in different seasons. A)  
590 Beta-diversity heatmaps. Bold squares indicate the stream section to which the samples belong  
591 (upstream/downstream of the barrier) B) Principal coordinate analysis (PCoA) graphs - full 3D versions  
592 available as html files in the Supplementary Material. The upper graphs (orange box) present the results  
593 for autumn, the lower graphs (blue box) present the results for winter. The color code corresponds to the  
594 one presented in Figure 1: violet = downstream sites, green = upstream sites.

595 **Fig. 5** Macroinvertebrate species' site occupancy plots (left) and ParCat distribution plots (right) for the  
596 'MZB species' dataset. A) Species found in the two sampling seasons, B) Species sorted after stream  
597 section divided by the barrier - autumn, C) Species sorted after stream section divided by the barrier -  
598 winter. The species' names marked in red indicate taxa potentially new for Sicily.

599

600 **Fig. S1** Venn diagrams showing the shared number of ESVs/species between the two sites closest to  
601 and divided by the in-stream barrier, according to the season. Violet = sampling site E5 (downstream  
602 from the barrier), green = sampling site E8 (upstream from the barrier).

603 **Fig. S2** ParCat distribution plot of macroinvertebrate species in the Fosso del Tempio river system and  
604 the neighboring streams.

605 **Tab. S1** The list of sampling localities. The names in bold indicate samples belonging to the Fosso del  
606 Tempio river system. Sites marked with an asterisk were sampled in a single season only.

607 **Tab. S2** i5 and i7 indices used for each sample and replicate in 2nd step PCR, and number of raw and  
608 filtered (replicates merged) reads obtained after sequencing.

609 **Tab. S3** Complete TaXon table obtained after final filtering steps ('All ESVs' dataset).

610 **Tab. S4** TaXon table obtained after taxonomic filtering for freshwater macroinvertebrates ('MZB ESVs'  
611 dataset and 'MZB species').

612 **Tab. S5** Jaccard distances for different seasons and different datasets. MeanW values indicate mean  
613 values for a particular site within the stream section the site belongs to, whereas MeanB values indicate  
614 mean values between stream sections.  $\Sigma$  values indicate mean values obtained for all sites within  
615 particular stream section.

616 **Tab. S6** TaXon table with the macroinvertebrate species potentially new for Sicily.

617 **Tab. S7** Number of macroinvertebrate species per order, according to the seasonality and the in-stream  
618 barrier.

619

620 **References:**

- 621 Almond, R., M. Grooten & T. Peterson, 2020. Living Planet Report 2020 - Bending the curve of  
622 biodiversity loss. World Wildlife Fund.
- 623 Andrews, S., 2010. FastQC: a quality control tool for high throughput sequence data. vol  
624 Available online at: <https://www.bioinformatics.babraham.ac.uk/projects/fastqc/>.  
625 Babraham Bioinformatics, Babraham Institute, Cambridge, United Kingdom.
- 626 Antich, A., C. Palacin, O. S. Wangensteen & X. Turon, 2021. To denoise or to cluster, that is not  
627 the question: optimizing pipelines for COI metabarcoding and metaphylogeography.  
628 BMC bioinformatics 22(1):1-24.
- 629 Arnell, N. W., 1999. Climate change and global water resources. Global environmental change  
630 9:S31-S49.
- 631 Balian, E. V., H. Segers, K. Martens & C. Lévêque, 2007. The freshwater animal diversity  
632 assessment: an overview of the results Freshwater animal diversity assessment.  
633 Springer, 627-637.
- 634 Berry, O., S. Jarman, A. Bissett, M. Hope, C. Paeper, C. Bessey, M. K. Schwartz, J. Hale & M.  
635 Bunce, 2020. Making environmental DNA (eDNA) biodiversity records globally  
636 accessible. Environmental DNA.
- 637 Bonada, N. & V. H. Resh, 2013. Mediterranean-climate streams and rivers: geographically  
638 separated but ecologically comparable freshwater systems. Hydrobiologia 719(1):1-29.
- 639 Brooks, A. J., B. Wolfenden, B. J. Downes & J. Lancaster, 2018. Barriers to dispersal: The  
640 effect of a weir on stream insect drift. River Research and Applications 34(10):1244-  
641 1253.
- 642 Buchner, D. & F. Leese, 2020. BOLDigger—a Python package to identify and organise  
643 sequences with the Barcode of Life Data systems. Metabarcoding and Metagenomics  
644 4:e53535.
- 645 Carew, M. E., V. J. Pettigrove, L. Metzeling & A. A. Hoffmann, 2013. Environmental monitoring  
646 using next generation sequencing: rapid identification of macroinvertebrate bioindicator  
647 species. Frontiers in zoology 10(1):1-15.
- 648 Chapman, M. & A. Underwood, 1999. Ecological patterns in multivariate assemblages:  
649 information and interpretation of negative values in ANOSIM tests. Marine ecology  
650 progress series 180:257-265.
- 651 Clarke, K. R., 1993. Non-parametric multivariate analyses of changes in community structure.  
652 Australian journal of ecology 18(1):117-143.
- 653 Closek, C. J., J. A. Santora, H. A. Starks, I. D. Schroeder, E. A. Andruszkiewicz, K. M. Sakuma,  
654 S. J. Bograd, E. L. Hazen, J. C. Field & A. B. Boehm, 2019. Marine vertebrate  
655 biodiversity and distribution within the central California Current using environmental  
656 DNA (eDNA) metabarcoding and ecosystem surveys. Frontiers in Marine Science 6:732.
- 657 Curry, C. J., J. F. Gibson, S. Shokralla, M. Hajibabaei & D. J. Baird, 2018. Identifying North  
658 American freshwater invertebrates using DNA barcodes: are existing COI sequence  
659 libraries fit for purpose? Freshwater Science 37(1):178-189.
- 660 De Figueroa, J. M. T., M. J. López-Rodríguez, S. Fenoglio, P. Sánchez-Castillo & R. Fochetti,  
661 2013. Freshwater biodiversity in the rivers of the Mediterranean Basin. Hydrobiologia  
662 719(1):137-186.
- 663 Deiner, K., E. A. Fronhofer, E. Mächler, J.-C. Walser & F. Altermatt, 2016. Environmental DNA  
664 reveals that rivers are conveyer belts of biodiversity information. Nature communications  
665 7(1):1-9.

- 666 Dhaouadi-Hassen, S. & M. Boumaiza, 2009. Reproduction and population dynamics of  
667 *Atyaephyra desmarestii* (Decapoda, Caridea) from the Sidi Salem dam lake (northern  
668 Tunisia). *Crustaceana*:129-139.
- 669 Dobson, M., 2004. Replacement of native freshwater snails by the exotic *Physa acuta*  
670 (Gastropoda: Physidae) in southern Mozambique; a possible control mechanism for  
671 schistosomiasis. *Annals of Tropical Medicine & Parasitology* 98(5):543-548.
- 672 Dudgeon, D., A. H. Arthington, M. O. Gessner, Z.-I. Kawabata, D. J. Knowler, C. Lévêque, R. J.  
673 Naiman, A.-H. Prieur-Richard, D. Soto & M. L. Stiassny, 2006. Freshwater biodiversity:  
674 importance, threats, status and conservation challenges. *Biological reviews* 81(2):163-  
675 182.
- 676 Elbrecht, V., E. E. Vamos, K. Meissner, J. Aroviita & F. Leese, 2017. Assessing strengths and  
677 weaknesses of DNA metabarcoding-based macroinvertebrate identification for routine  
678 stream monitoring. *Methods in Ecology and Evolution* 8(10):1265-1275.
- 679 Erba, S., G. Pace, D. Demartini, D. Di Pasquale, G. Dörflinger & A. Buffagni, 2015. Land use at  
680 the reach scale as a major determinant for benthic invertebrate community in  
681 Mediterranean rivers of Cyprus. *Ecological Indicators* 48:477-491.
- 682 Evans, K. M., A. H. Wortley & D. G. Mann, 2007. An assessment of potential diatom “barcode”  
683 genes (*cox1*, *rbcL*, *18S* and *ITS rDNA*) and their effectiveness in determining  
684 relationships in *Sellaphora* (Bacillariophyta). *Protist* 158(3):349-364.
- 685 Feio, M., J. Ferreira, A. Buffagni, S. Erba, G. Dörflinger, M. Ferréol, A. Munné, N. Prat, I.  
686 Tziortzis & G. Urbanič, 2014. Comparability of ecological quality boundaries in the  
687 Mediterranean basin using freshwater benthic invertebrates. *Statistical options and*  
688 *implications*. *Science of the Total Environment* 476:777-784.
- 689 Feio, M. J., S. R. Serra, A. Mortágua, A. Bouchez, F. Rimet, V. Vasselon & S. F. Almeida, 2020.  
690 A taxonomy-free approach based on machine learning to assess the quality of rivers  
691 with diatoms. *Science of the Total Environment* 722:137900.
- 692 Fernández, S., S. Rodríguez-Martínez, J. L. Martínez, E. Garcia-Vazquez & A. Ardura, 2019.  
693 How can eDNA contribute in riverine macroinvertebrate assessment? A metabarcoding  
694 approach in the Nalón River (Asturias, Northern Spain). *Environmental DNA* 1(4):385-  
695 401.
- 696 Fidalgo, M. L., P. Santos, C. Ferreira & A. Silva, 2015. Population structure and dynamics of the  
697 freshwater shrimp *Atyaephyra desmarestii* (Millet, 1831) in the lower River Minho (NW  
698 Portugal). *Crustaceana* 88(6):657-673.
- 699 Garcia, C., C. N. Gibbins, I. Pardo & R. J. Batalla, 2017. Long term flow change threatens  
700 invertebrate diversity in temporary streams: Evidence from an island. *Science of the*  
701 *Total Environment* 580:1453-1459.
- 702 García, L., I. Pardo & C. Delgado, 2014. Macroinvertebrate indicators of ecological status in  
703 Mediterranean temporary stream types of the Balearic Islands. *Ecological indicators*  
704 45:650-663.
- 705 Gasith, A. & V. H. Resh, 1999. Streams in Mediterranean climate regions: abiotic influences and  
706 biotic responses to predictable seasonal events. *Annual review of ecology and*  
707 *systematics* 30(1):51-81.
- 708 Goldberg, C. S., K. M. Strickler & D. S. Pilliod, 2015. Moving environmental DNA methods from  
709 concept to practice for monitoring aquatic macroorganisms. *Biological Conservation*  
710 183:1-3.
- 711 Grill, G., B. Lehner, M. Thieme, B. Geenen, D. Tickner, F. Antonelli, S. Babu, P. Borrelli, L.  
712 Cheng & H. Crochetiere, 2019. Mapping the world’s free-flowing rivers. *Nature*  
713 569(7755):215-221.
- 714 Hajibabaei, M., T. M. Porter, C. V. Robinson, D. J. Baird, S. Shokralla & M. T. Wright, 2019.  
715 Watered-down biodiversity? A comparison of metabarcoding results from DNA extracted  
716 from matched water and bulk tissue biomonitoring samples. *PloS one* 14(12):e0225409.
- 717 Hänfling, B., L. Lawson Handley, D. S. Read, C. Hahn, J. Li, P. Nichols, R. C. Blackman, A.  
718 Oliver & I. J. Winfield, 2016. Environmental DNA metabarcoding of lake fish  
719 communities reflects long-term data from established survey methods. *Molecular*  
720 *ecology* 25(13):3101-3119.

- 721 Harper, L. R., L. Lawson Handley, C. Hahn, N. Boonham, H. C. Rees, K. C. Gough, E. Lewis, I.  
722 P. Adams, P. Brotherton & S. Phillips, 2018. Needle in a haystack? A comparison of  
723 eDNA metabarcoding and targeted qPCR for detection of the great crested newt  
724 (*Triturus cristatus*). *Ecology and evolution* 8(12):6330-6341.
- 725 Harrison, J. B., J. M. Sunday & S. M. Rogers, 2019. Predicting the fate of eDNA in the  
726 environment and implications for studying biodiversity. *Proceedings of the Royal Society*  
727 *B* 286(1915):20191409.
- 728 Hopkins, L., 2002. IUCN and the Mediterranean Islands: Opportunities for biodiversity  
729 conservation and sustainable use. International Union for Conservation of Nature:  
730 Gland, Switzerland.
- 731 Hughes, J. M., D. J. Schmidt & D. S. Finn, 2009. Genes in streams: using DNA to understand  
732 the movement of freshwater fauna and their riverine habitat. *BioScience* 59(7):573-583.
- 733 Hupało, K., F. Stoch, I. Karaouzas, A. Wysocka, T. Rewicz, T. Mamos & M. Grabowski, 2021.  
734 Freshwater Malacostraca of the Mediterranean Islands—Diversity, Origin, and  
735 Conservation Perspectives Recent Advances in Freshwater Crustacean Biodiversity and  
736 Conservation. CRC Press, 139-220.
- 737 Kumar, S., G. Stecher & K. Tamura, 2016. MEGA7: molecular evolutionary genetics analysis  
738 version 7.0 for bigger datasets. *Molecular biology and evolution* 33(7):1870-1874.
- 739 Latella, L., S. Ruffo & F. Stoch, 2007. The project CKmap (Checklist and distribution of the  
740 Italian fauna) methods and informatical techniques. *Memorie del Museo Civico di Storia*  
741 *Naturale di Verona* 17:15-19.
- 742 Leese, F., M. Sander, D. Buchner, V. Elbrecht, P. Haase & V. M. Zizka, 2021. Improved  
743 freshwater macroinvertebrate detection from environmental DNA through minimized  
744 nontarget amplification. *Environmental DNA*.
- 745 Lobera, G., I. Pardo, L. García & C. García, 2019. Disentangling spatio-temporal drivers  
746 influencing benthic communities in temporary streams. *Aquatic Sciences* 81(4):1-17.
- 747 Macher, J. N., A. Vivancos, J. J. Piggott, F. C. Centeno, C. D. Matthaei & F. Leese, 2018.  
748 Comparison of environmental DNA and bulk-sample metabarcoding using highly  
749 degenerate cytochrome c oxidase I primers. *Molecular ecology resources* 18(6):1456-  
750 1468.
- 751 Macher, T.-H., A. J. Beermann & F. Leese, 2021a. TaxonTableTools-A comprehensive,  
752 platform-independent graphical user interface software to explore and visualise DNA  
753 metabarcoding data. *Molecular Ecology Resources*.
- 754 Macher, T.-H., R. Schütz, J. Arle, A. J. Beermann, J. Koschorreck & F. Leese, 2021b. Beyond  
755 fish eDNA metabarcoding: Field replicates disproportionately improve the detection of  
756 stream associated vertebrate species. *bioRxiv*.
- 757 Mächler, E., C. J. Little, R. Wüthrich, R. Alther, E. A. Fronhofer, I. Gounand, E. Harvey, S.  
758 Hürlemann, J. C. Walser & F. Altermatt, 2019. Assessing different components of  
759 diversity across a river network using eDNA. *Environmental DNA* 1(3):290-301.
- 760 Makiola, A., Z. G. Compson, D. J. Baird, M. A. Barnes, S. P. Boerlijst, A. Bouchez, G. Brennan,  
761 A. Bush, E. Canard & T. Cordier, 2020. Key questions for next-generation biomonitoring.  
762 *Frontiers in Environmental Science* 7:197.
- 763 Mariani, S., L. R. Harper, R. A. Collins, C. Baillie, O. Wangensteen, A. McDevitt, M. Heddell-  
764 Cowie & M. J. Genner, 2021. Estuarine molecular bycatch as a landscape-wide  
765 biomonitoring tool. *bioRxiv*.
- 766 Marrone, F. & L. Naselli-Flores, 2015. A review on the animal xenodiversity in Sicilian inland  
767 waters (Italy). *Advances in Oceanography and Limnology*.
- 768 Martin, M., 2011. Cutadapt removes adapter sequences from high-throughput sequencing  
769 reads. *EMBnet journal* 17(1):10-12.
- 770 Médail, F. & P. Quézel, 1999. Biodiversity hotspots in the Mediterranean Basin: setting global  
771 conservation priorities. *Conservation biology* 13(6):1510-1513.
- 772 Myers, N., R. A. Mittermeier, C. G. Mittermeier, G. A. Da Fonseca & J. Kent, 2000. Biodiversity  
773 hotspots for conservation priorities. *Nature* 403(6772):853.

- 774 Pawlowski, J., S. Audic, S. Adl, D. Bass, L. Belbahri, C. Berney, S. S. Bowser, I. Cepicka, J.  
775 Decelle & M. Dunthorn, 2012. CBOL protist working group: barcoding eukaryotic  
776 richness beyond the animal, plant, and fungal kingdoms. *PLoS Biol* 10(11):e1001419.  
777 Pentinsaari, M., S. Ratnasingham, S. E. Miller & P. D. Hebert, 2020. BOLD and GenBank  
778 revisited—Do identification errors arise in the lab or in the sequence libraries? *PloS one*  
779 15(4):e0231814.
- 780 Poff, N. L. & J. K. Zimmerman, 2010. Ecological responses to altered flow regimes: a literature  
781 review to inform the science and management of environmental flows. *Freshwater*  
782 *biology* 55(1):194-205.
- 783 Ratnasingham, S. & P. D. Hebert, 2007. BOLD: The Barcode of Life Data System ([http://www.](http://www.barcodinglife.org)  
784 [barcodinglife.org](http://www.barcodinglife.org)). *Molecular ecology notes* 7(3):355-364.
- 785 Rees, H. C., B. C. Maddison, D. J. Middleditch, J. R. Patmore & K. C. Gough, 2014. The  
786 detection of aquatic animal species using environmental DNA—a review of eDNA as a  
787 survey tool in ecology. *Journal of Applied Ecology* 51(5):1450-1459.
- 788 Reid, A. J., A. K. Carlson, I. F. Creed, E. J. Eliason, P. A. Gell, P. T. Johnson, K. A. Kidd, T. J.  
789 MacCormack, J. D. Olden & S. J. Ormerod, 2019. Emerging threats and persistent  
790 conservation challenges for freshwater biodiversity. *Biological Reviews* 94(3):849-873.
- 791 Rognes, T., T. Flouri, B. Nichols, C. Quince & F. Mahé, 2016. VSEARCH: a versatile open  
792 source tool for metagenomics. *PeerJ* 4:e2584.
- 793 Ruffo, S. & F. Stoch, 2006. Checklist and distribution of the Italian fauna. *Commune di Verona*.  
794 Sari, A., M. Duran & F. Bardakci, 2012. Discrimination of Orthocladiinae species (Diptera:  
795 Chironomidae) by using cytochrome c oxidase subunit I. *Acta Zoologica Bulgarica* 4:73-  
796 80.
- 797 Schmidt, T. S., J. F. Matias Rodrigues & C. von Mering, 2015. Limits to robustness and  
798 reproducibility in the demarcation of operational taxonomic units. *Environmental*  
799 *microbiology* 17(5):1689-1706.
- 800 Schoch, C. L., K. A. Seifert, S. Huhndorf, V. Robert, J. L. Spouge, C. A. Levesque, W. Chen &  
801 F. B. Consortium, 2012. Nuclear ribosomal internal transcribed spacer (ITS) region as a  
802 universal DNA barcode marker for Fungi. *Proceedings of the National Academy of*  
803 *Sciences* 109(16):6241-6246.
- 804 Schoolmann, G., F. Nitsche & H. Arndt, 2015. Aspects of the life span and phenology of the  
805 invasive freshwater shrimp *Atyaephyra desmarestii* (Millet, 1831) at the northeastern  
806 edge of its range (upper Rhine). *Crustaceana* 88(9):949-962.
- 807 Sinclair, C. & S. Gresens, 2008. Discrimination of *Cricotopus* species (Diptera: Chironomidae)  
808 by DNA barcoding. *Bulletin of entomological research* 98(6):555.
- 809 Skoulidakis, N. T., S. Sabater, T. Datry, M. M. Morais, A. Buffagni, G. Dörflinger, S. Zogaris, M.  
810 del Mar Sánchez-Montoya, N. Bonada & E. Kalogianni, 2017. Non-perennial  
811 Mediterranean rivers in Europe: status, pressures, and challenges for research and  
812 management. *Science of the Total Environment* 577:1-18.
- 813 Stewart, K. A., 2019. Understanding the effects of biotic and abiotic factors on sources of  
814 aquatic environmental DNA. *Biodiversity and Conservation* 28(5):983-1001.
- 815 Stoch, F., 2000. How many endemic species? Species richness assessment and conservation  
816 priorities in Italy. *Belgian Journal of Entomology* 2(1):125-133.
- 817 Strayer, D. L. & D. Dudgeon, 2010. Freshwater biodiversity conservation: recent progress and  
818 future challenges. *Journal of the North American Benthological Society* 29(1):344-358.
- 819 Stubbington, R., R. Chadd, N. Cid, Z. Csabai, M. Miliša, M. Morais, A. Munné, P. Pařil, V. Peřić  
820 & I. Tziortzis, 2018. Biomonitoring of intermittent rivers and ephemeral streams in  
821 Europe: Current practice and priorities to enhance ecological status assessments.  
822 *Science of the total environment* 618:1096-1113.
- 823 Taberlet, P., A. Bonin, L. Zinger & E. Coissac, 2018. *Environmental DNA: For biodiversity*  
824 *research and monitoring*. Oxford University Press.
- 825 Tapolczai, K., F. Keck, A. Bouchez, F. Rimet, M. Kahlert & V. Vasselon, 2019. Diatom DNA  
826 metabarcoding for biomonitoring: strategies to avoid major taxonomical and  
827 bioinformatical biases limiting molecular indices capacities. *Frontiers in Ecology and*  
828 *Evolution* 7:409.

- 829 Tapolczai, K., G. B. Selmeczy, B. Szabó, B. Viktória, F. Keck, A. Bouchez, F. Rimet & J.  
830 Padišák, 2021. The potential of exact sequence variants (ESVs) to interpret and assess  
831 the impact of agricultural pressure on stream diatom assemblages revealed by DNA  
832 metabarcoding. *Ecological Indicators* 122:107322.
- 833 Turon, X., A. Antich, C. Palacín, K. Præbel & O. S. Wangensteen, 2020. From metabarcoding to  
834 metaphylogeography: separating the wheat from the chaff. *Ecological Applications*  
835 30(2):e02036.
- 836 Vamos, E., V. Elbrecht & F. Leese, 2017. Short COI markers for freshwater macroinvertebrate  
837 metabarcoding. *Metabarcoding and Metagenomics*, 1, e14625.
- 838 Vinarski, M. V., 2017. The history of an invasion: phases of the explosive spread of the physid  
839 snail *Physella acuta* through Europe, Transcaucasia and Central Asia. *Biological*  
840 *invasions* 19(4):1299-1314.
- 841 Vörösmarty, C. J., P. B. McIntyre, M. O. Gessner, D. Dudgeon, A. Prusevich, P. Green, S.  
842 Glidden, S. E. Bunn, C. A. Sullivan & C. R. Liermann, 2010. Global threats to human  
843 water security and river biodiversity. *nature* 467(7315):555-561.
- 844 Wallace, J. B., J. W. Grubaugh & M. R. Whiles, 1996. Biotic indices and stream ecosystem  
845 processes: results from an experimental study. *Ecological applications* 6(1):140-151.
- 846 Weigand, H., A. J. Beermann, F. Čiampor, F. O. Costa, Z. Csabai, S. Duarte, M. F. Geiger, M.  
847 Grabowski, F. Rimet & B. Rulík, 2019. DNA barcode reference libraries for the  
848 monitoring of aquatic biota in Europe: Gap-analysis and recommendations for future  
849 work. *Science of the Total Environment* 678:499-524.
- 850 Westcott, S. L. & P. D. Schloss, 2015. De novo clustering methods outperform reference-based  
851 methods for assigning 16S rRNA gene sequences to operational taxonomic units. *PeerJ*  
852 3:e1487.
- 853 Zizka, V. M., V. Elbrecht, J. N. Macher & F. Leese, 2019. Assessing the influence of sample  
854 tagging and library preparation on DNA metabarcoding. *Molecular ecology resources*  
855 19(4):893-899.
- 856 Zizka, V. M. A., M. Weiss & F. Leese, 2020. Can metabarcoding resolve intraspecific genetic  
857 diversity changes to environmental stressors? A test case using river macrozoobenthos.  
858 *Metabarcoding and Metagenomics* 4:e51925.
- 859 Zukowski, S. & K. F. Walker, 2009. Freshwater snails in competition: alien *Physa acuta*  
860 (*Physidae*) and native *Glyptophysa gibbosa* (*Planorbidae*) in the River Murray, South  
861 Australia. *Marine and Freshwater Research* 60(10):999-1005.
- 862

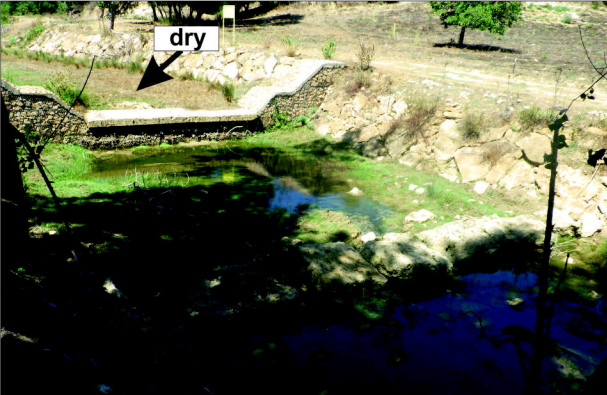

**Autumn**

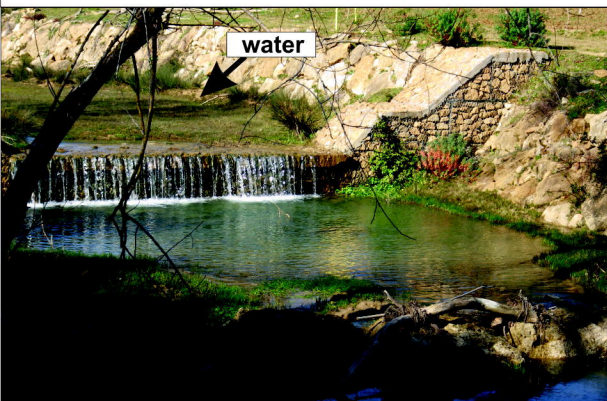

**Winter**

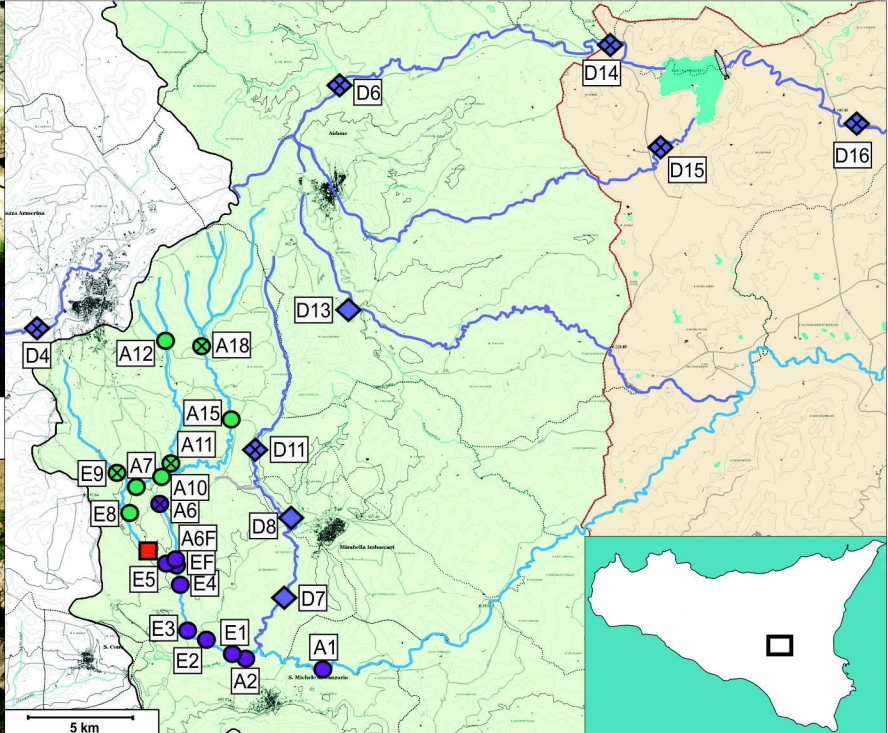

- Fosso del Tempio system
- ◇ neighboring catchment
- in-stream barrier
- ⊗◇ sampled only one season
- downstream from barrier
- upstream from barrier

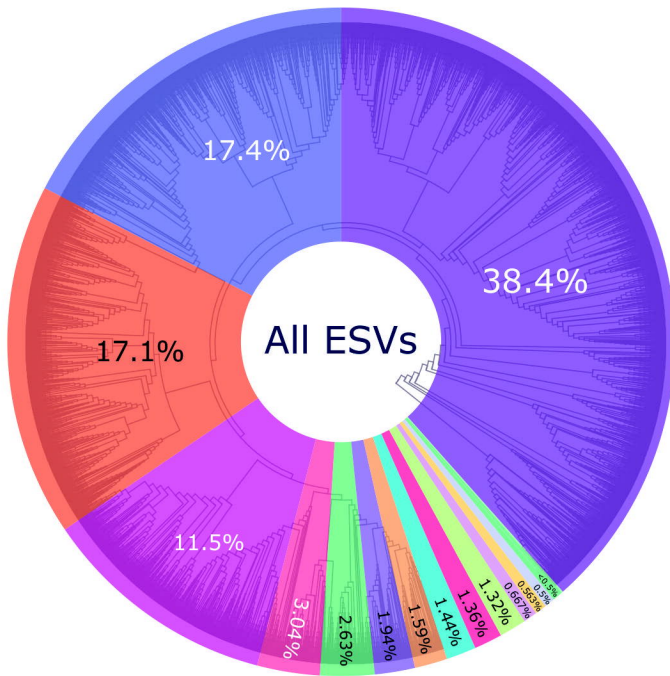

- Phylum; #ESVs; #species
- Arthropoda; 3497; 230
  - Bacillariophyta; 401; 5
  - Heterokontophyta; 959; 50
  - Rotifera; 201; 5
  - Ochrophyta; 629; 1
  - Annelida; 117; 16
  - Cnidaria; 284; 2
  - Rhodophyta; 182; 3
  - Ascomycota; 363; 9
  - Basidiomycota; 185; 0
  - Amoebozoa; 108; 1
  - Mollusca; 86; 9
  - Porifera; 102; 0
  - Nematoda; 83; 3
  - Other:
  - Echinodermata; 18; 0
  - Cryptophyta; 37; 3
  - Haptophyta; 3; 0
  - Chordata; 8; 2
  - Gastrotricha; 7; 0
  - Platyhelminthes; 3; 0
  - Proteobacteria; 24; 0
  - Zygomycota; 8; 0
  - Chlorophyta; 13; 0
  - Onychophora; 2; 0
  - Myxomycota; 4; 0
  - Nemertea; 2; 1
  - Placozoa; 2; 0
  - Bryozoa; 2; 0
  - Glomeromycota; 1; 0

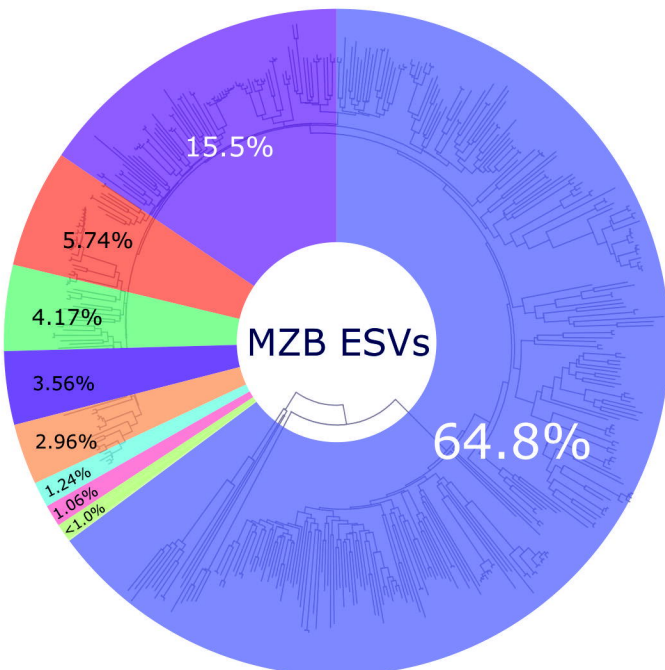

- Order; #ESVs; #species
- Diptera; 217; 53
  - Amphipoda; 20; 2
  - Haplotaaxida; 47; 8
  - Porifera\*; 102; 0
  - Trichoptera; 14; 7
  - Sphaeriida; 10; 0
  - Ephemeroptera; 10; 5
  - Basommatophora; 2; 1
  - Other:
  - Coleoptera; 20; 13
  - Plecoptera; 5; 0
  - Hemiptera; 6; 1
  - Decapoda; 6; 2
  - Odonata; 7; 6



### MZB species

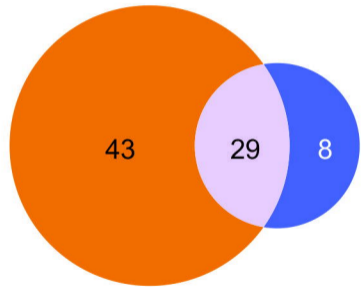

### MZB ESVs

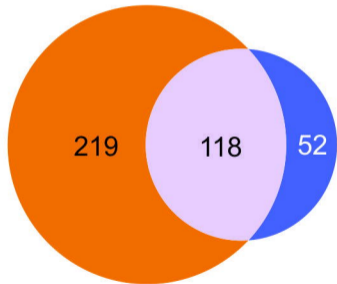

### All ESVs

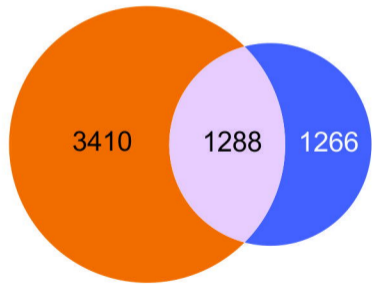

Autumn  
Winter

# MZB species

# MZB ESVs

# All ESVs

## A

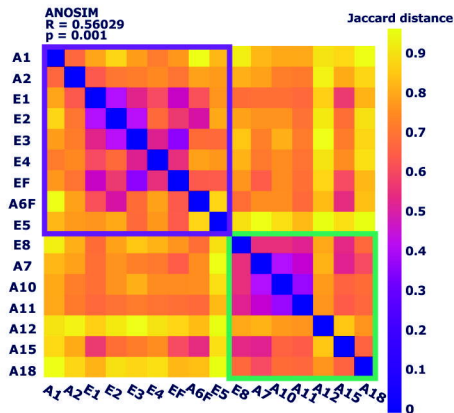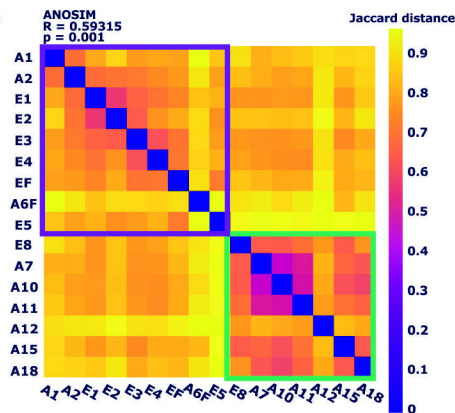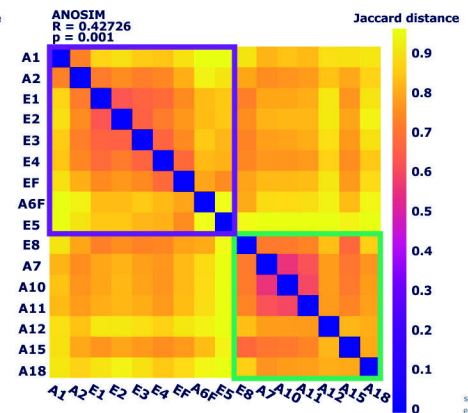

## B

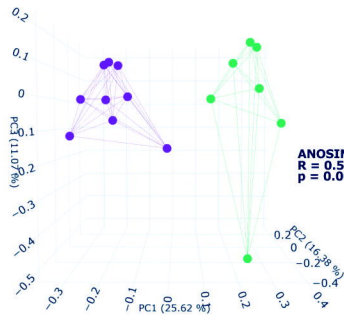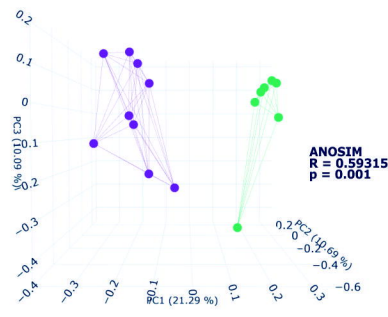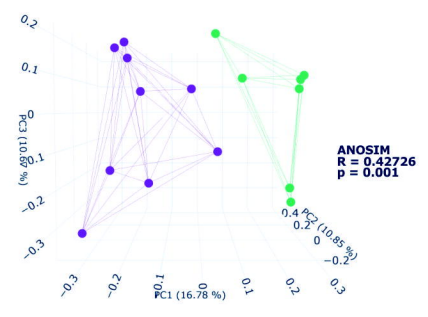

## A

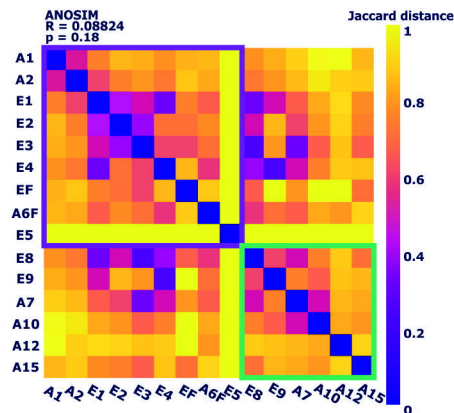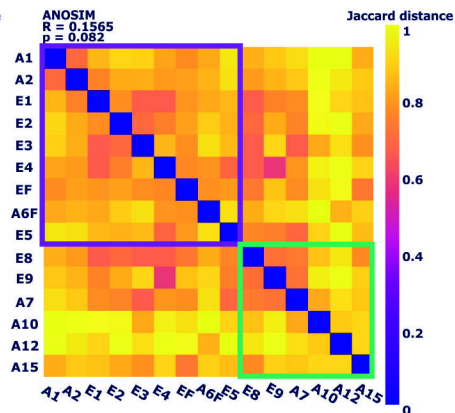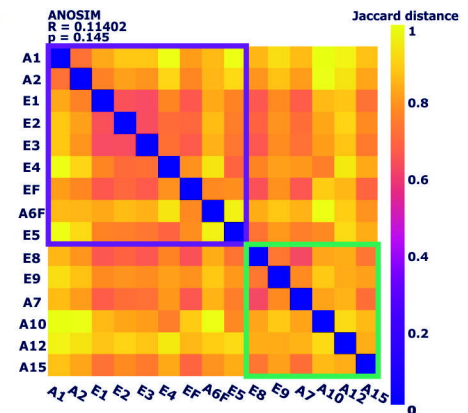

## B

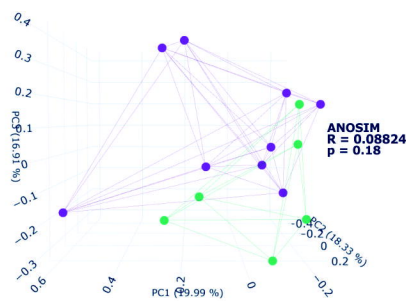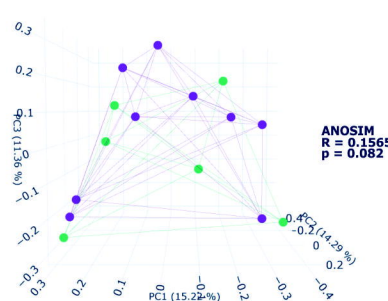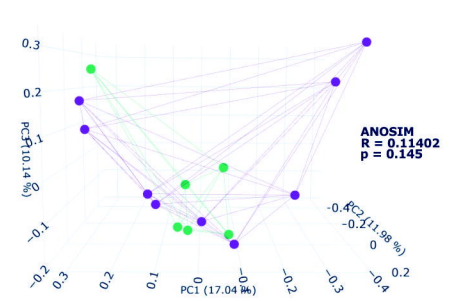

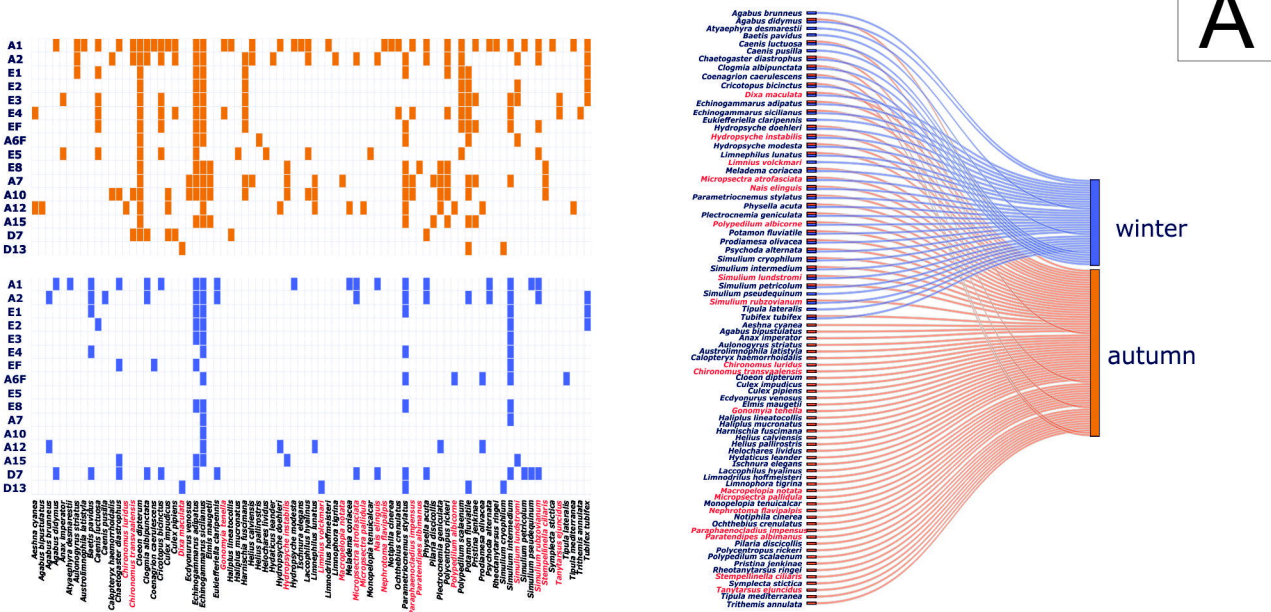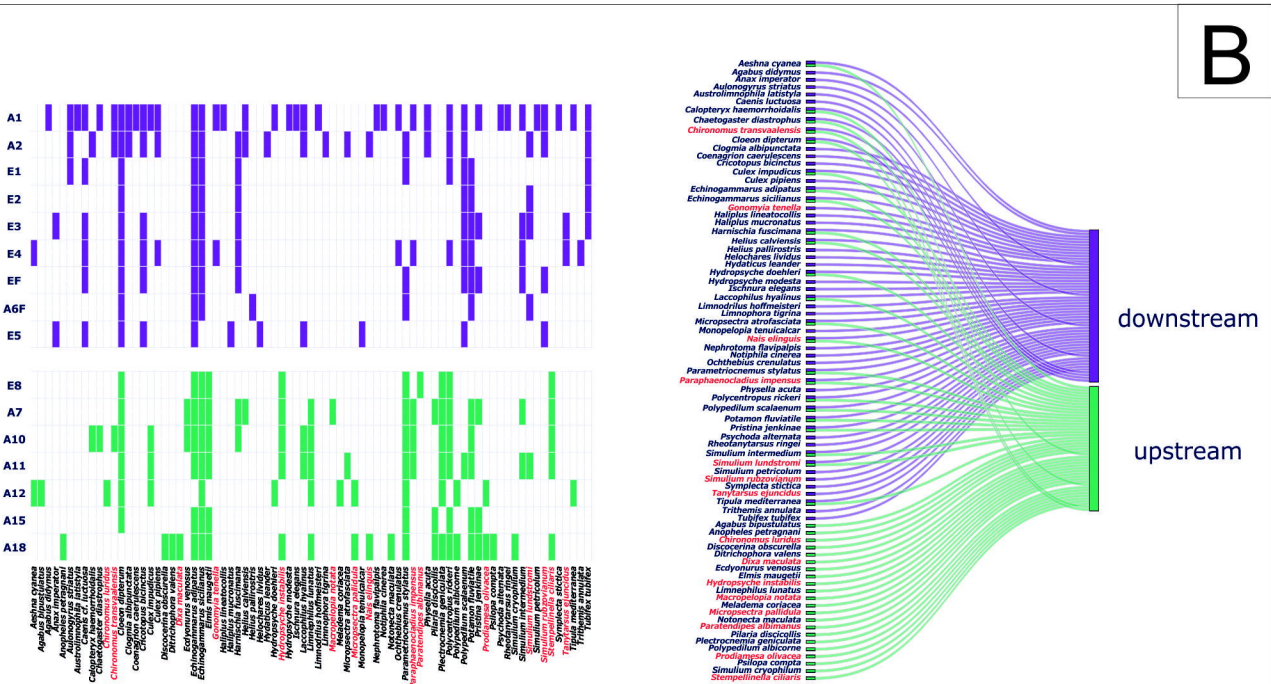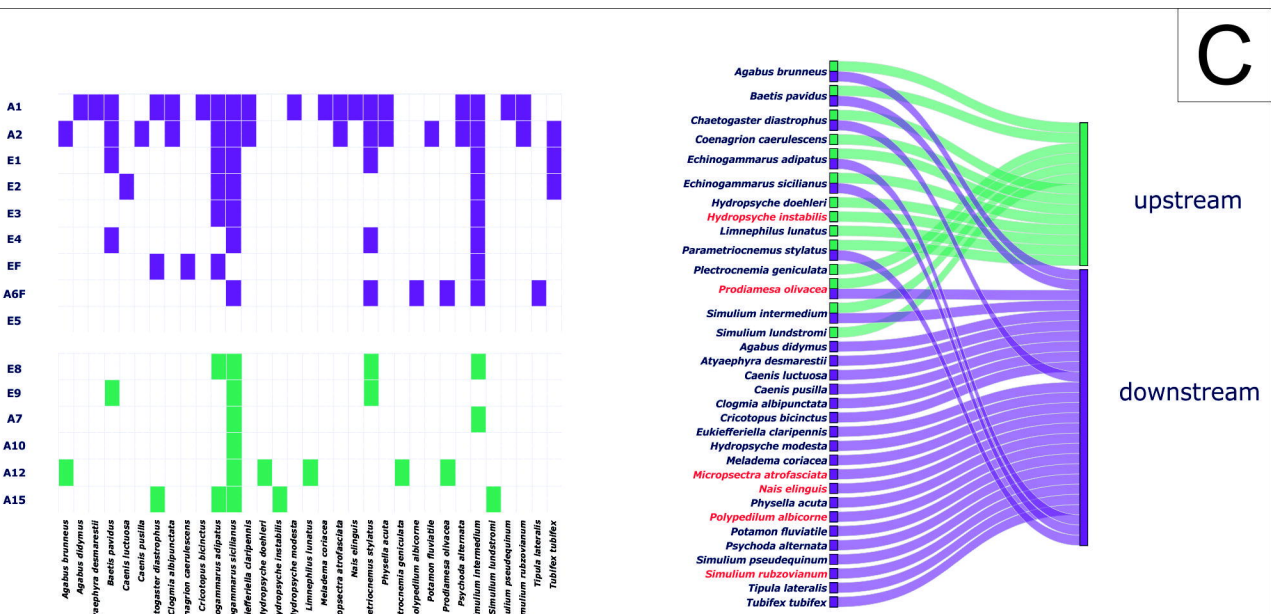

Source: https://www.biorxiv.org/content/10.1101/2021.06.10.447858v1.full.pdf
